# Supplementary material for: A Double-Blind, Randomized, Placebo-Controlled, Dose-Frequency Study of Intravenous Ketamine in Patients With Treatment-Resistant Depression
Source: Atypon-hosted journal article supplement (doi:10.1176/appi.ajp.2016.16010037), 2016-04-08

Data Supplement for Singh et al., A Double-Blind, Randomized, Placebo-Controlled, Dose-Frequency Study of Intravenous Ketamine in Patients With Treatment-Resistant Depression. Am J Psychiatry (doi: 10.1176/appi.ajp.2016.16010037)

## **Table/Figure legends**

### **Tables**

**Table S1:** MADRS total score – open-label and follow-up phase (OL ITT analysis set)

**Table S2:** Pharmacokinetic parameters of ketamine and norketamine

**Table S3:** Changes in C-SSRS categories scores from baseline (safety analysis set)

### **Figures**

**Figure S1:** MADRS total scores over time for individual patients (ITT [DB] analysis set): A. Ketamine 2X/Week Patients; B. Ketamine 3X/Week Patients

**Figure S2:** Ketamine and norketamine plasma concentration-time profiles

**TABLE S1: MADRS total score – open-label and follow-up phase (OL ITT analysis set)**

|                                                                                                                                                                                               | MADRS total score |       | MADRS total score – change from baseline |       |
|-----------------------------------------------------------------------------------------------------------------------------------------------------------------------------------------------|-------------------|-------|------------------------------------------|-------|
|                                                                                                                                                                                               | Mean              | SD    | Mean                                     | SD    |
| <b>OL Ketamine 2X/WK</b>                                                                                                                                                                      |                   |       |                                          |       |
| Day 4, (n = 12)                                                                                                                                                                               | 23.5              | 11.00 | -12.2                                    | 12.81 |
| <b>FU Ketamine 2X/WK</b>                                                                                                                                                                      |                   |       |                                          |       |
| Day 4, (n = 10)                                                                                                                                                                               | 21.7              | 12.47 | -12.6                                    | 12.25 |
| Day 11, (n = 5)                                                                                                                                                                               | 11.4              | 9.13  | -26.2                                    | 12.21 |
| Day 18, (n = 2)                                                                                                                                                                               | 17.5              | 0.71  | -19.0                                    | 0.0   |
| <b>OL Ketamine 3X/WK</b>                                                                                                                                                                      |                   |       |                                          |       |
| Day 3, (n = 15)                                                                                                                                                                               | 23.5              | 10.30 | -13.3                                    | 9.62  |
| Day 5, (n = 16)                                                                                                                                                                               | 22.6              | 12.11 | -14.0                                    | 12.50 |
| <b>FU Ketamine 3X/WK</b>                                                                                                                                                                      |                   |       |                                          |       |
| Day 4, (n = 11)                                                                                                                                                                               | 22.4              | 13.68 | -14.6                                    | 14.47 |
| Day 11, (n = 7)                                                                                                                                                                               | 26.4              | 13.35 | -13.4                                    | 12.00 |
| Day 18, (n = 7)                                                                                                                                                                               | 28.7              | 13.26 | -9.3                                     | 12.74 |
| 2X/Week = two-times weekly; 3X/Week = three-times weekly; FU = follow-up; ITT = intent-to-treat; MADRS = Montgomery-Asberg Depression Rating Scale; OL = open-label; SD = standard deviation. |                   |       |                                          |       |

**TABLE S2: Pharmacokinetic parameters of ketamine and norketamine**

| Treatment/Day                                                                                                                                                                                |                    | C <sub>max</sub><br>(ng/mL) |      | t <sub>max</sub> (h) |       |      | AUC <sub>6h</sub><br>(h·ng/mL) |                   | t <sub>1/2</sub> (h) |                   |
|----------------------------------------------------------------------------------------------------------------------------------------------------------------------------------------------|--------------------|-----------------------------|------|----------------------|-------|------|--------------------------------|-------------------|----------------------|-------------------|
|                                                                                                                                                                                              |                    | Mean                        | SD   | Median               | Range |      | Mean                           | SD                | Mean                 | SD                |
|                                                                                                                                                                                              |                    |                             |      |                      | Min   | Max  |                                |                   |                      |                   |
| <b>Ketamine</b>                                                                                                                                                                              |                    |                             |      |                      |       |      |                                |                   |                      |                   |
| 2X/Week                                                                                                                                                                                      | Day 1<br>(n = 16)  | 207                         | 83.0 | 0.67                 | 0.63  | 0.83 | 312                            | 67.9              | 2.18                 | 0.43 <sup>a</sup> |
|                                                                                                                                                                                              | Day 15<br>(n = 14) | 219                         | 69.4 | 0.67                 | 0.63  | 1.00 | 342                            | 66.7              | 2.39                 | 0.36 <sup>b</sup> |
| 3X/Week                                                                                                                                                                                      | Day 1<br>(n = 16)  | 168                         | 34.4 | 0.66                 | 0.33  | 0.75 | 295                            | 42.8 <sup>c</sup> | 2.18                 | 0.40 <sup>a</sup> |
|                                                                                                                                                                                              | Day 15<br>(n = 15) | 189                         | 74.4 | 0.67                 | 0.5   | 0.83 | 293                            | 65.6 <sup>d</sup> | 2.21                 | 0.36 <sup>c</sup> |
| <b>Norketamine</b>                                                                                                                                                                           |                    |                             |      |                      |       |      |                                |                   |                      |                   |
| 2X/Week                                                                                                                                                                                      | Day 1<br>(n = 16)  | 77.3                        | 24.2 | 1.00                 | 0.83  | 2.00 | 259                            | 73.2              | 5.75                 | 3.60              |
|                                                                                                                                                                                              | Day 15<br>(n = 14) | 76.2                        | 19.8 | 1.00                 | 0.83  | 3.00 | 265                            | 76.9              | 5.96                 | 2.66 <sup>a</sup> |
| 3X/Week                                                                                                                                                                                      | Day 1<br>(n = 16)  | 63.5                        | 20.4 | 1.00                 | 0.83  | 2.00 | 232                            | 70.3              | 6.70                 | 2.54              |
|                                                                                                                                                                                              | Day 15<br>(n = 15) | 71.6                        | 23.9 | 1.00                 | 0.75  | 2.00 | 237                            | 69.7              | 6.06                 | 2.49              |
| 2X/Week = two-times weekly; 3X/Week = three-times weekly; min: minimum; max: maximum; <sup>a</sup> n = 13; <sup>b</sup> n = 9; <sup>c</sup> n = 15; <sup>d</sup> n = 14; <sup>e</sup> n = 8. |                    |                             |      |                      |       |      |                                |                   |                      |                   |

**TABLE S3: Changes in C-SSRS categories scores from baseline (safety analysis set)**

| Baseline Category                                                                                                                                           | On Treatment Category     |                   |                   |
|-------------------------------------------------------------------------------------------------------------------------------------------------------------|---------------------------|-------------------|-------------------|
|                                                                                                                                                             | No Sui. Idea. or behavior | Suicidal ideation | Suicidal behavior |
| <b>Placebo 2X/WK (n = 16)</b>                                                                                                                               |                           |                   |                   |
| No Sui. Idea. or behavior                                                                                                                                   | 4                         | 0                 | 0                 |
| Suicidal ideation                                                                                                                                           | 1                         | 2                 | 0                 |
| Suicidal behavior                                                                                                                                           | 3                         | 6                 | 0                 |
| <b>Ketamine 2X/WK (n = 18)</b>                                                                                                                              |                           |                   |                   |
| No Sui. Idea. or behavior                                                                                                                                   | 8                         | 0                 | 0                 |
| Suicidal ideation                                                                                                                                           | 1                         | 3                 | 0                 |
| Suicidal behavior                                                                                                                                           | 5                         | 1                 | 0                 |
| <b>Placebo 3X/WK (n = 16)</b>                                                                                                                               |                           |                   |                   |
| No Sui. Idea. or behavior                                                                                                                                   | 3                         | 0                 | 0                 |
| Suicidal ideation                                                                                                                                           | 3                         | 3                 | 0                 |
| Suicidal behavior                                                                                                                                           | 2                         | 5                 | 0                 |
| <b>Ketamine 3X/WK (n = 17)</b>                                                                                                                              |                           |                   |                   |
| No Sui. Idea. or behavior                                                                                                                                   | 7                         | 0                 | 0                 |
| Suicidal ideation                                                                                                                                           | 4                         | 2                 | 0                 |
| Suicidal behavior                                                                                                                                           | 2                         | 2                 | 0                 |
| <b>OL Ketamine 2X/WK (n = 13)</b>                                                                                                                           |                           |                   |                   |
| No Sui. Idea. or behavior                                                                                                                                   | 2                         | 0                 | 0                 |
| Suicidal ideation                                                                                                                                           | 1                         | 2                 | 0                 |
| Suicidal behavior                                                                                                                                           | 6                         | 2                 | 0                 |
| <b>OL Ketamine 3X/WK (n = 18)</b>                                                                                                                           |                           |                   |                   |
| No Sui. Idea. or behavior                                                                                                                                   | 4                         | 0                 | 0                 |
| Suicidal ideation                                                                                                                                           | 3                         | 3                 | 0                 |
| Suicidal behavior                                                                                                                                           | 5                         | 3                 | 0                 |
| 2X/Week = two-times weekly; 3X/Week = three-times weekly; C-SSRS=Columbia Suicide Severity Rating Scale; Idea. = ideation; OL = open-label; Sui. = suicidal |                           |                   |                   |

**FIGURE S1: MADRS total scores over time for individual patients (ITT [DB] analysis set): A). Ketamine 2X/Week Patients; B). Ketamine 3X/Week Patients**

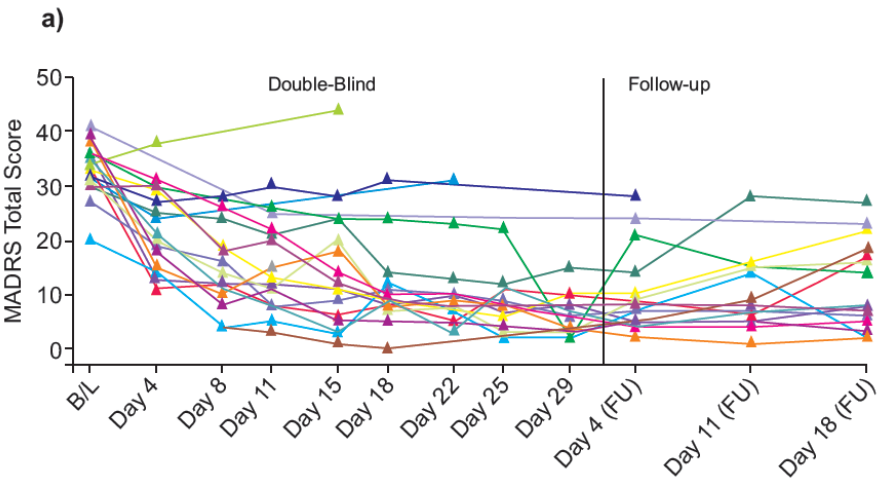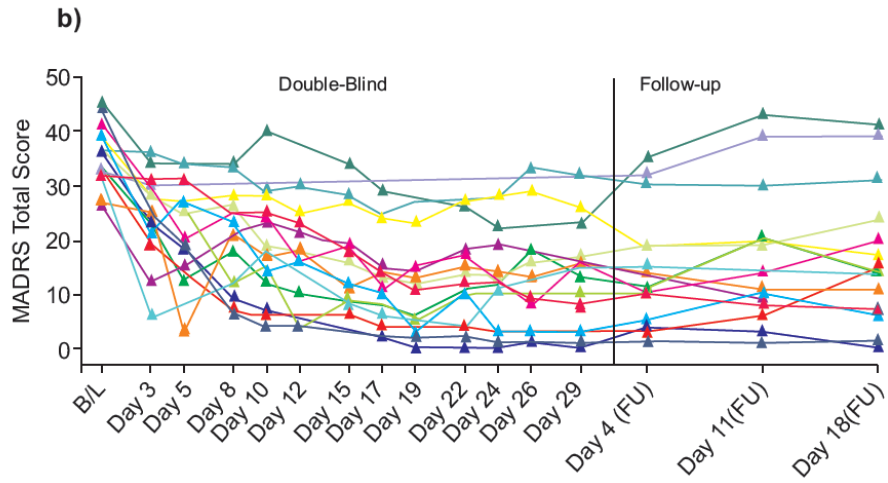

**FIGURE S2: Ketamine and norketamine plasma concentration-time profiles**

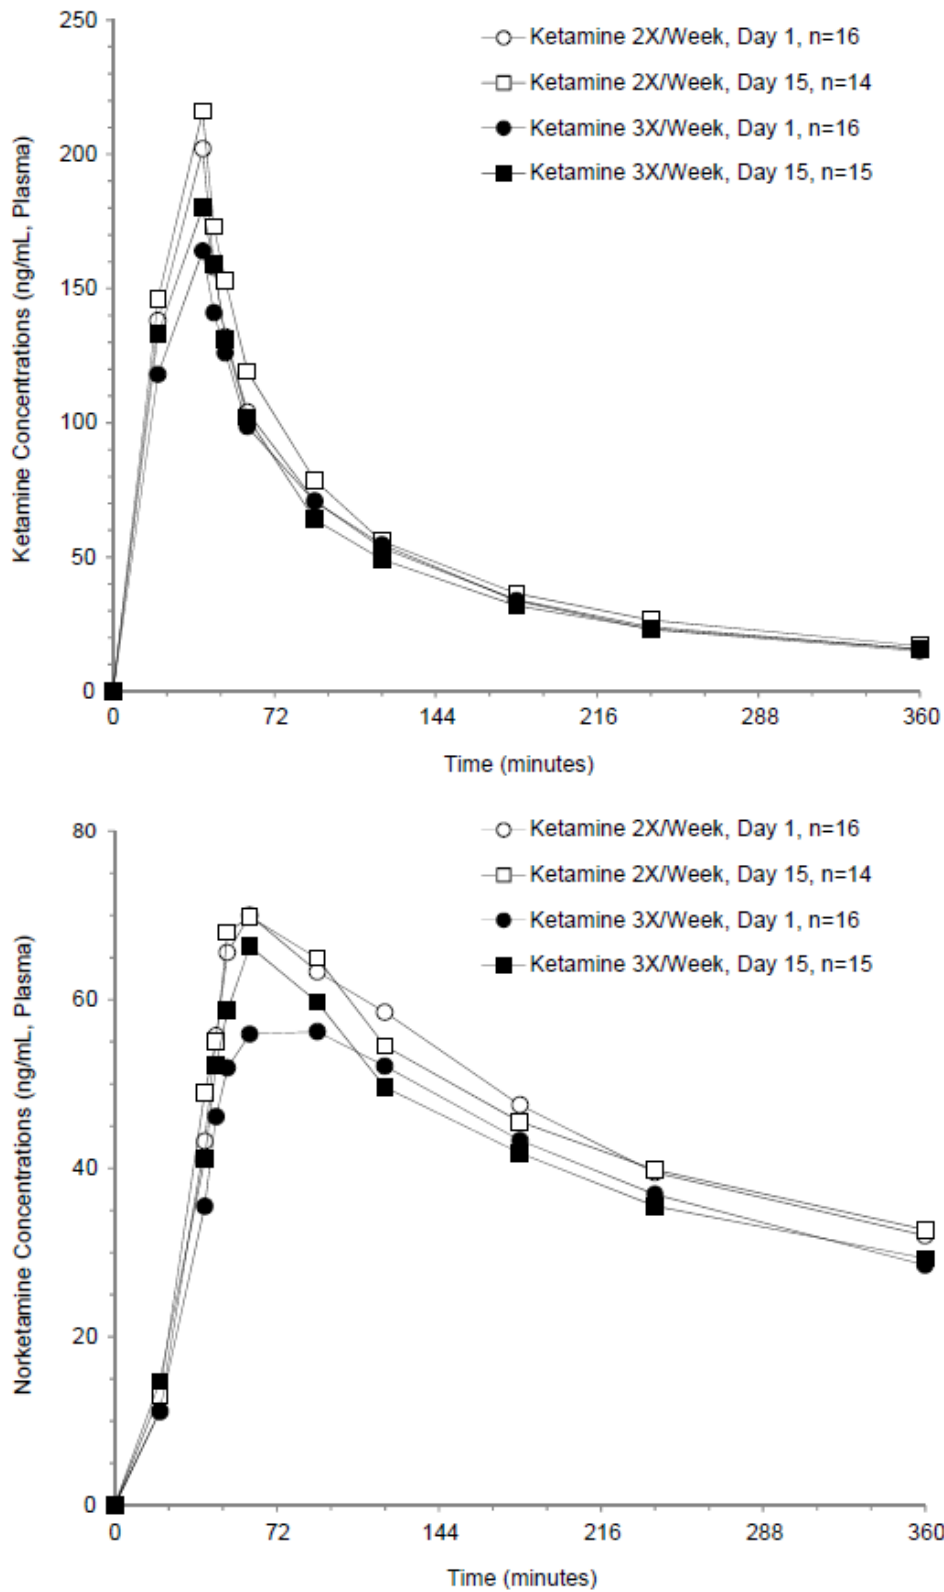

Supplement: appi.ajp.2016.16010037.ds001.pdf [file appi.ajp.2016.16010037.ds001.pdf]
